# Supplementary material
Source: PubMed Central journal article supplement (PMC7724340)
Supplement: ajtr0012-7060-f14.pdf [file ajtr0012-7060-f14.pdf]

## Immune-related lncRNA signature of COAD

### Primer sequences

#### **AC027307.2**

Primer

Fw 5-3, TCTATCTTTGCCCTTCTGGTC

Re 5-3, CTTTCAGCCCTAAGTTCCT

amplicon length: 60 bp, Tm 60

#### **AC074117.1**

Primer

Fw 5-3, TCTGCCAGTAGTGAAAGATGG

Re 5-3, AGGCAAGAGGATCACTTCAG

amplicon length: 80 bp, Tm 60

#### **AC103702.2**

Primer

Fw 5-3, GATGGAGTTAGGAGAGGGC

Re 5-3, CGCGCTGAACAAGATTCTC

amplicon length: 131 bp, Tm 60

#### **CYTOR**

Primer

Fw 5-3, TTGACATTCCAGACAAGCG

Re 5-3, TTTGCTTGCAAGGAGAGG

amplicon length: 102 bp, Tm 58

#### **LINC02381**

Primer

Fw 5-3, ATCTAGATGAGCCTGTCCG

Re 5-3, CAAGGTCTGGAACAAGCTG

amplicon length: 101 bp, Tm 58

#### **MIR200CHG**

Primer

Fw 5-3, CTCTAGGCCGTGGAATCTG

Re 5-3, TGAAGGTTACTGTCACCGG

amplicon length: 91 bp, Tm 59

#### **SNHG16**

Primer

Fw 5-3, CTCTAGTAGCCACGGTGTG

Re 5-3, GGGAGCTAACATTAAGACATGG

amplicon length: 82 bp, Tm 60
